1 **Title:** Meta-analysis of diets used in *Drosophila* microbiome research and introduction  
2 of the *Drosophila* Dietary Composition Calculator (DDCC)

3

4 Danielle N.A. Lesperance<sup>1\*</sup> and Nichole A. Broderick<sup>1,2\*</sup>

5 <sup>1</sup>Department of Molecular and Cell Biology, University of Connecticut, Storrs, CT 06269  
6 U.S.A

7 <sup>2</sup>Institute for Systems Genomics, University of Connecticut, Storrs, CT 06269 U.S.A

8

9 \*Correspondence to: Nichole A. Broderick ([nichole.broderick@uconn.edu](mailto:nichole.broderick@uconn.edu);

10 <https://orcid.org/0000-0002-6830-9456>) or Danielle N.A. Lesperance

11 ([danielle.andrzejewski@uconn.edu](mailto:danielle.andrzejewski@uconn.edu); <https://orcid.org/0000-0002-0241-5141>)

12

### 13 **Key words**

14 *Drosophila melanogaster*, artificial diets, gut microbiota, nutritional analysis, host-  
15 microbe interactions

16

### 17 **Abstract**

18 While the term standard diet is commonly used in studies using *Drosophila*  
19 *melanogaster*, more often than not these diets are anything but standard, making it  
20 difficult to contextualize results in the broader scope of the field. This is especially  
21 evident in microbiome studies, despite diet having a pivotal role in microbiome  
22 composition and resulting host-microbe interactions. Here, we performed a meta-  
23 analysis of diets used in fly microbiome research and provide a web-based tool for

24 researchers to determine the nutritional content of diets of interest. Our goal is for these  
25 community resources to aid in contextualizing both past and future microbiome studies  
26 (with utility to other fields as well) to better understand how individual lab diets can  
27 contribute to observed phenotypes.

28

## 29 **Introduction**

30 In the laboratory, the typical *Drosophila melanogaster* diet is composed of agar, yeast, a  
31 sugar source, and cornmeal. However, in reality dietary compositions vary greatly  
32 across laboratories, making it difficult to clearly define the composition of a “standard”  
33 fly diet. Multiple “branded standard” diets exist such as the Bloomington Standard or  
34 CalTech diets that originated at hubs of *D. melanogaster* research, and while many lab  
35 groups base their own diets on these recipes, the vast majority of groups maintain flies  
36 on diets unique to their laboratory. Differences between these diets, despite their  
37 general suitability for fly rearing, can make it challenging to contextualize studies within  
38 the scope of *D. melanogaster* research, as nutrition is a critical factor influencing many  
39 aspects of physiology including metabolism (Piper *et al.* 2005; Brookheart and Duncan  
40 2016), behavior (Edgecomb *et al.* 1994; Ormerod *et al.* 2017; Davies *et al.* 2018),  
41 development (Ormerod *et al.* 2017; Grangeteau *et al.* 2018), longevity (Piper *et al.*  
42 2005; Ormerod *et al.* 2017; Stefana *et al.* 2017), and microbiome composition and  
43 function (Wong *et al.* 2014; Obadia *et al.* 2018; Erkosar *et al.* 2018). The relationship  
44 between nutrition and the gut microbiome is particularly important, as altering one will  
45 likely impact the other with physiologic consequences. Diet plays a pivotal role in  
46 shaping microbiome composition and affects interactions between microbiota and host,

47 and the microbiome itself impacts the fly's nutritional environment, both as a direct  
48 source of nourishment and via production and/or utilization of nutrients (Storelli *et al.*  
49 2011; Shin *et al.* 2011; Wong *et al.* 2014; Yamada *et al.* 2015; Huang and Douglas  
50 2015; Broderick 2016; Keebaugh *et al.* 2018; Erkosar *et al.* 2018; Keebaugh *et al.*  
51 2019). Together, dietary nutrition and the microbiome act in concert with one another to  
52 dictate nutritional physiology (**Figure 1**).

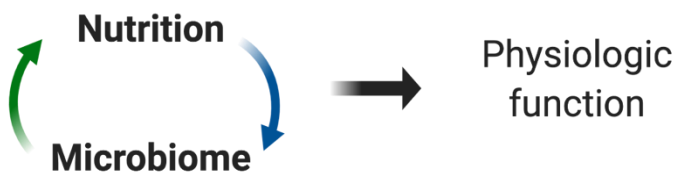

53

54 **Figure 1. Dietary nutrition and the microbiome are inextricably linked.**

55 Dietary nutritional content impacts the diversity and abundance of microbiome  
56 members, can influence microbe-microbe interactions, and affects  
57 metabolites produced by the microbiome. At the same time, the microbiome  
58 itself contributes to overall nutrition via production of metabolites, which are  
59 then utilized by the host, catabolism of carbohydrates, and by serving as a  
60 direct source of protein to the fly. Together, dietary nutrition and the  
61 microbiome interact to play a significant role in host physiology.

62

63 In an effort to aid in the contextualization of studies focused on the *D. melanogaster*  
64 microbiome, we performed a meta-analysis of diets used across the field. We analyzed  
65 the nutrition values of diet recipes, focusing on protein and carbohydrate content of  
66 diets to visualize how widely “standard” laboratory diets vary across *D. melanogaster*  
67 microbiome studies. Additionally, we have provided a web-based tool for use by the

68 broader community that we've named the Drosophila Diet Composition Calculator  
69 (DDCC, <https://www.brodericklab.com/DDCC.php>), which can be used to rapidly  
70 determine the macronutrient content of diets of interest simply by inputting amounts of  
71 each diet component for a given diet. It is our hope that this meta-analysis and the  
72 DDCC can be used to better understand dietary influences on previously observed  
73 phenotypes and serve as a resource for experimental design of future studies involving  
74 fly nutrition.

75

## 76 **Methods**

### 77 ***Nutritional information for dietary components***

78 Values for calories, fiber, sugars, protein, fat, and carbohydrates were determined for  
79 each dietary component using nutritional labels for specific food products, information  
80 directly from manufacturers, or from NutritionData.com, a database of food nutritional  
81 values obtained from the United States Department of Agriculture's National Nutrient  
82 Database for Standard Reference. The sources for each dietary component are  
83 provided in the Supplemental Files. The carbohydrate and protein information for raw  
84 fruits was determined using NutritionData.com.

85

### 86 ***Analysis of dietary differences across microbiome studies- Fly Microbiome Diet***

#### 87 ***Database***

88 Dietary compositions from over 50 articles (listed in **TableS1**) with a focus on the *D.*  
89 *melanogaster* microbiome were recorded in appropriate columns of the database  
90 (Columns A-AF). Calculations for calories per liter, grams of fiber per liter, sugars per

91 liter, protein per liter, fat per liter, carbohydrates per liter, percent fiber, percent sugars,  
92 percent protein, percent fat, percent carbohydrates, and the ratio of protein to  
93 carbohydrates (P:C) (Columns AH-AT) were performed within the spreadsheet using  
94 the previously determined nutritional value for each dietary component. Nutritional  
95 information for the holidic fly diet (Piper *et al.* 2014) was determined by inputting the  
96 agar and sucrose amounts in the spreadsheet as normal and adding the calculated final  
97 mass of amino acids per liter to the formula in Column AL (grams of protein per liter).  
98 Similarly, for other diets containing one unique ingredient not otherwise represented in  
99 the database, calculations were performed as normal with the nutritional information for  
100 the unique ingredient added manually. In these cases, notes are made on the database  
101 to indicate special calculations. If it was not possible to calculate the nutritional  
102 information for an individual diet, it is noted in Columns AH-AM. Articles that did not  
103 readily provide dietary composition were documented for analytical purposes but  
104 excluded from the publicly available database. Ultimately, six “branded standard” diets  
105 and 71 explicitly reported diets from the literature were included in the database. An  
106 additional 14 studies examined did not provide their dietary composition.

107

### 108 ***The Drosophila Dietary Composition Calculator (DDCC)***

109 Calculations used to obtain the nutrition facts for the database were used to generate  
110 the calculator tool found at <https://www.brodericklab.com/DDCC.php>. Through this web-  
111 tool we also invite researchers to submit published diets using the provided web form to  
112 be placed in the publicly available database.

113

## 114 **Data availability**

115 The source files for all nutritional information used to create the Fly Microbiome Diet  
116 Database and the DDCC are located at  
117 [<https://doi.org/10.6084/m9.figshare.11920743.v1>]. A downloadable version of the Fly  
118 Microbiome Diet Database is located at  
119 [<https://doi.org/10.6084/m9.figshare.11920788.v2>].

120

## 121 **Results and Discussion**

### 122 ***Comparison of diets used across fly microbiome studies***

123 We analyzed the nutritional content of over 70 published diets used for *D. melanogaster*  
124 microbiome research based on the dietary components listed in the study methods.  
125 Dietary composition varies considerably both in the types of components used and the  
126 amounts of components, leading to a wide range of calories, protein, carbohydrate, fat,  
127 and fiber levels (**Figure 2**). Moreover, the type/source of a given ingredient can impact  
128 these values. For example, for a common ingredient like yeast, several different  
129 formulations are used including active, inactive, brewer's, Lesaffre, and Springaline, all  
130 of which have unique nutritional compositions (e.g. protein content ranges from 38% in  
131 active dry yeast to 63% in Springaline yeast). Specific ingredients can also add  
132 unexpected components to diet. For example, Springaline yeast (BioSpringer), used by  
133 a number of European fly immunity/microbiome labs contains 0.03 grams of the  
134 antioxidant glutathione per gram of yeast, meaning typical diets can range from 1.5-1.8  
135 grams of added glutathione per liter of diet. This equates to a concentration of around 5

136 mM, a level used in some studies to block superoxide toxicity (Kim *et al.* 1997; Buchon  
137 *et al.* 2009).

138

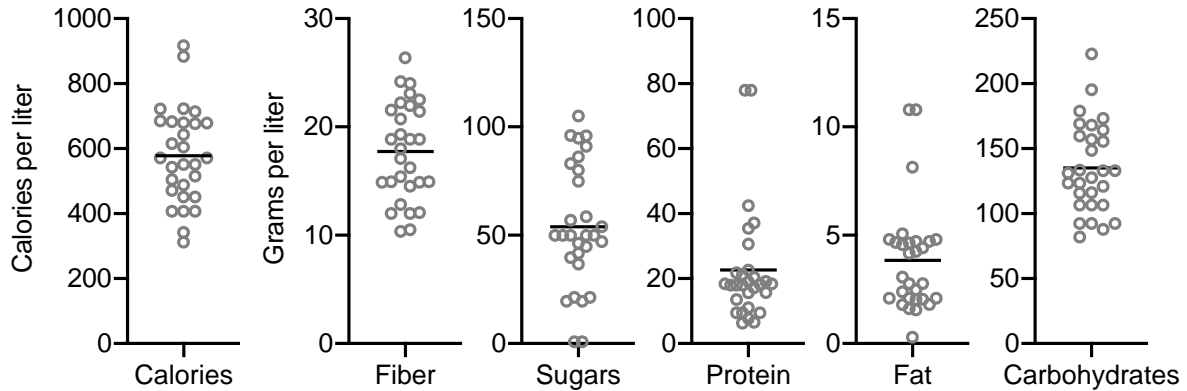

139

140 **Figure 2. Nutritional content of “standard” *D. melanogaster* diets.** Calories,  
141 grams of fiber, grams of sugars, grams of protein, grams of fat, and grams of  
142 carbohydrates per liter of food of laboratory diets reported as “standard” in the  
143 literature. Each point represents a different diet. The minimum and maximum values  
144 for each parameter as are follows: Calories- 311.97 and 917.13, Fiber- 10.36 and  
145 26.38, Sugars- 0.80 and 105.00, Protein- 6.33 and 77.93, Fat- 0.30 and 10.80,  
146 Carbohydrates- 81.90 and 222.71. Line represents mean. n=29 diets referred to as  
147 “standard” out of 71 diets.

148

149 To get a better sense for nutritional differences across the diets, we focused on protein  
150 and carbohydrate content (**Figure 3A**). While some overlap was seen, particularly for  
151 “branded standards” or multiple studies from the same laboratory, the overall spread of  
152 protein and carbohydrate content was large. Dietary protein to carbohydrate (P:C) ratio  
153 is known to be an important factor influencing life history traits (Lee *et al.* 2008; Jang  
154 and Lee 2018), so we next compared P:C of each diet and identified a range of

155 maintenance diets (i.e. not experimental diets with altered diet components) with P:C's  
156 from 0.05 to 0.86 (**Figure 3B**). We additionally noted that a range of P:C's existed for  
157 diets considered "rich" or "poor" with regard to protein content. "Poor" diet P:C's were  
158 between 0.03 and 0.69 with "rich" diets ranging from 0.05 to 0.8 (**Figure 3B**).  
159

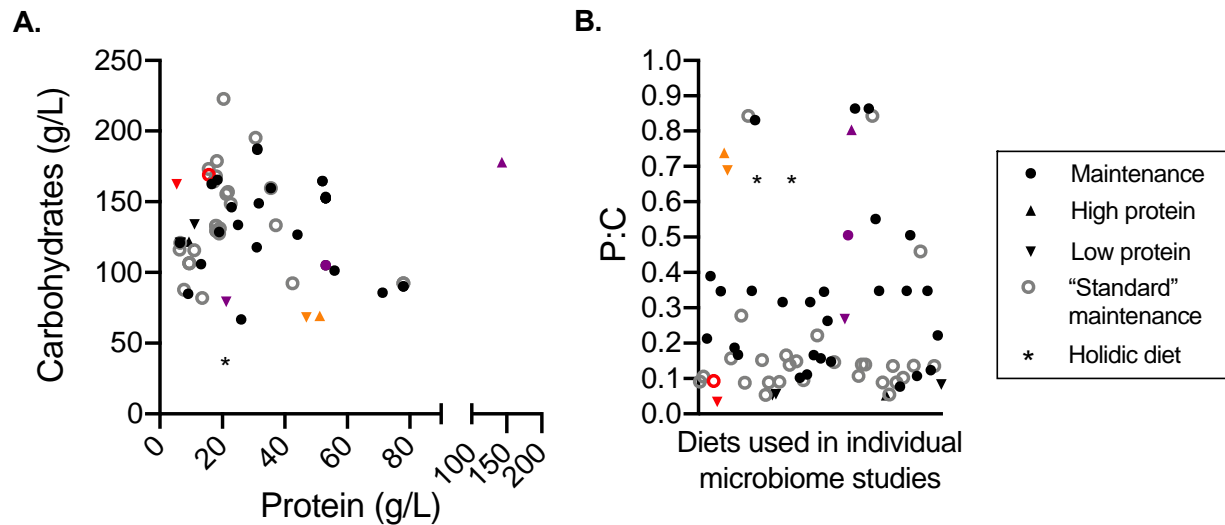

160  
161 **Figure 3. Comparisons of diets used across microbiome research. A)** Protein and  
162 carbohydrate content of diets as determined using the microbiome database. **B)** Protein-  
163 to-carbohydrate ratio (protein divided by carbohydrates) of individual diets. Each point  
164 represents a different diet reported in fly microbiome literature: closed circles represent  
165 diets used for normal maintenance of fly lines; triangles represent diets specifically defined  
166 as "rich" or high protein; inverted triangles represent diets designated as "poor" or low  
167 protein; open grey circles represent maintenance diets that are described as "standard" in  
168 the literature; asterisks represent the holidic fly diet. In **(B)**, red points are examples of two  
169 diets used in the same study that represent both a normal and low protein diet (Shin *et al.*  
170 2011); orange points similarly represent another study utilizing a high and low protein



171 (Storelli *et al.* 2011); purple points represent a third study using multiple diets (Erkosar *et*  
172 *al.* 2018). n=71 diets (14 diets were not provided).

173

174 Using this visualization of dietary composition, we observed an interesting comparison  
175 between two studies that each demonstrated a role for the microbiome in normal larval  
176 development in protein poor conditions (achieved through reduced yeast levels; Storelli  
177 *et al.* 2011 and Shin *et al.* 2011). Shin *et al.* used two diets that are relatively low in  
178 protein (red points) and only differed in P:C by 0.06. Storelli *et al.* also used two diets  
179 that differed in P:C by a similar level (0.05), however compared to Shin *et al.* these diets  
180 were relatively protein rich (orange points). Both studies show that the microbiome  
181 enhanced fly development on their respective low protein diets, but not on the higher  
182 protein version. Our comparative analysis indicates that small shifts in protein, even if  
183 not evident from P:C values, can be sufficient to reveal biologically important phenotypic  
184 effects of diet. However, while the observed phenotypes were similar in these studies,  
185 different mechanisms behind the observed developmental effects were reported,  
186 including being attributed to different microbiome members- *Acetobacter pomorum* in  
187 Shin *et al.* and *Lactobacillus plantarum* in Storelli *et al.* Our analysis shows that the  
188 overall diets differ significantly in both protein and carbohydrates levels (**Figure 3**),  
189 which could explain the different microbes and mechanisms, as macromolecule  
190 concentrations could greatly impact microbiome composition, microbe and/or host  
191 physiology, and/or the resulting interaction. This is supported by recent work by Erkosar  
192 *et al.* who showed that flies reared on diets containing significantly different  
193 concentrations of yeast (**Figure 3**, purple points) had distinct shifts in microbial  
194 community composition (Erkosar *et al.* 2018). These examples highlight the importance

195 of contextualizing studies based on dietary composition and how such comparisons can  
196 influence interpretation and subsequent studies.

197

### 198 ***The “standard diet” fallacy***

199 At the time of writing, 16% of articles examined (14 of 85) gave no clearly defined diet  
200 composition and of this group, 71% (10 of 14) described their diet as “standard.”

201 Overall, 46% of diets from all articles (39 of 85) were referred to as “standard,” yet both  
202 the range of diet components and total nutritional values of these diets are large (**Figure**  
203 **2** and shown as open grey in **Figure 3**). It is clear from the ranges we observed that no  
204 true “standard” diet exists, highlighting the problematic, but common, phrasing of  
205 “standard fly diet” in the literature, which is compounded when the diet recipe is not  
206 provided. Our analysis only looked at fly microbiome studies, but we expect this is a  
207 wide-spread problem and that other areas of *D. melanogaster* research have a similarly  
208 wide range of “standard” diets (whether explicitly reported or not).

209

### 210 ***Artificial versus natural diets***

211 To understand how the range of laboratory diets compares to natural fruit diets that *D.*  
212 *melanogaster* encounters in the wild, we obtained protein and carbohydrate information  
213 (grams per kilogram) for apples, pears, grapes, bananas, oranges, limes, peaches, and  
214 lemons. Carbohydrates spanned from 93 g/kg to 228 g/kg and protein from 3 g/kg to 11  
215 g/kg, resulting in a range of P:C’s from 0.02 to 0.11 (**Figure 4**). While many artificial  
216 diets fall within this range, protein content is typically much higher in laboratory  
217 conditions compared to natural diets, which may contribute to the lower diversity of

218 microbes found in laboratory reared flies compared to wild-caught (Chandler *et al.* 2011;  
219 Erkosar *et al.* 2018). In either natural or artificial diets, however, the nutritional role of  
220 microbes must also be considered. In nature, *D. melanogaster* only associates with  
221 decomposing (ripe/over-ripe) fruit that support high densities of yeasts and bacteria,  
222 which presumably alter macronutrient content of the food while also providing nutrients  
223 directly. While artificial diets remove the requirement for microbes to break down  
224 complex plant material before consumption by the fly, microbes likely still impact  
225 nutrition in artificial diets, but the extent of this and its impacts on the fly in “standard”  
226 conditions has not been extensively explored.  
227

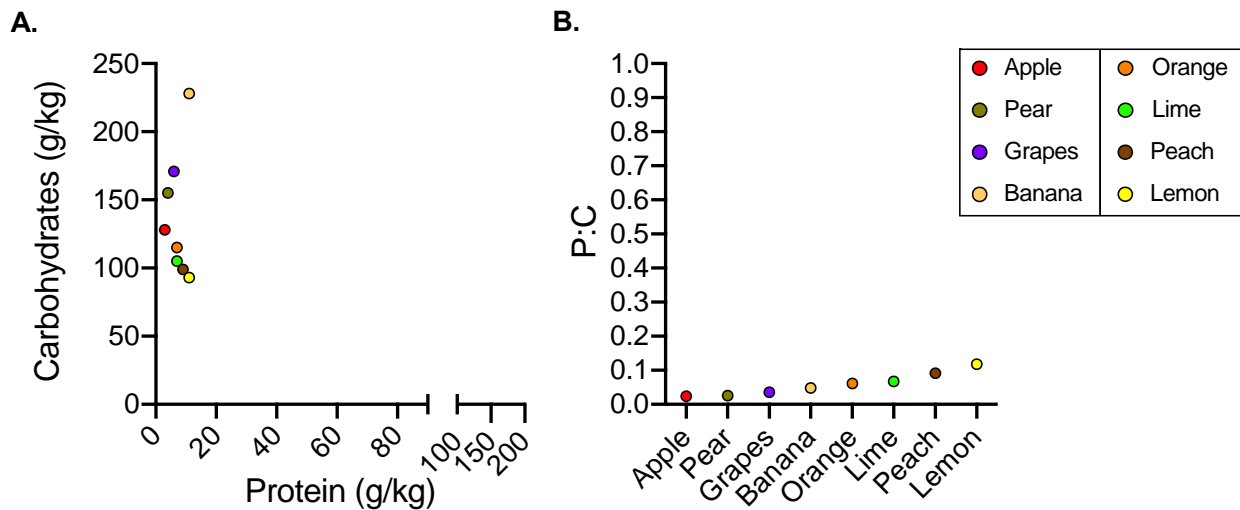

228  
229 **Figure 4. Comparison of protein and carbohydrate content of fruits. A)** Protein and  
230 carbohydrates of raw fruits. **B)** Protein-to-carbohydrate ratio (protein divided by  
231 carbohydrates) of raw fruits. Each point represents nutritional information for a different  
232 fruit as provided by the United States Department of Agriculture.

233

234

235 ***Does D. melanogaster need a standard diet?***

236 It is clear that differences in fly diet have led to issues in reproducibility of results across  
237 the field (See Sharon *et al.* 2010, Obadia *et al.* 2018, and Leftwich *et al.* 2018 for one  
238 example; Douglas 2018 for commentary on another). One approach to combat such  
239 issues is the use of a fully defined diet such as the holidic diet (Piper *et al.* 2014). There  
240 are many advantages of using a chemically defined diet, as diet components are more  
241 strictly controlled, providing greater power to assess the role of individual diet  
242 components on host physiology and microbiome-mediated impacts. However,  
243 chemically defined diets are labor-intensive to make and are less representative of  
244 natural, complex dietary substrates (which include complex textures, different particle  
245 sizes, etc.) making this an unrealistic option for standardization of fly rearing and  
246 research across fields. We suggest that a manageable and reasonable approach to  
247 address dietary differences across studies is simply to require explicit reporting of diet  
248 composition at the time of publication. While having such data does not eliminate  
249 variability, it is invaluable for contextualizing results and phenotypes, provides potential  
250 explanations for observed differences, and testable hypotheses for follow-up in  
251 subsequent studies. We also expect that use of complex diet components is beneficial  
252 for discovery of physiologically relevant phenotypes that may otherwise be lost or  
253 artificially altered on more defined diets. For example, food particle size in animal gut  
254 ecosystems is known to impact digestion and bulk passage rate as well as microbiome  
255 composition through attachment and microcolony support (Cheng *et al.* 1981; Martz and  
256 Belyea 1986; Bjorndal *et al.* 1990; McAllister *et al.* 1994; Vermeulen *et al.* 2018; Kiarie  
257 and Mills 2019). Ultimately, what is important is that researchers understand the

258 nutritional implications of the diets they use and look to nutritional information as a  
259 resource to aid in analysis of results and comparison across laboratories. It is our hope  
260 that the examples highlighted in this meta-analysis and the data provided by the DDCC  
261 will aid in a broader appreciation for the importance of dietary reporting, and help to  
262 contextualize observations across research studies using *D. melanogaster*.

263

#### 264 **Web resources**

265 *Fly Microbiome Diet Database:*

266 <https://doi.org/10.6084/m9.figshare.11920788.v2>

267

268 *Drosophila Dietary Composition Calculator:*

269 <https://www.brodericklab.com/DDCC.php>

270

#### 271 **Acknowledgements**

272 The *Drosophila* Dietary Composition Calculator was created by Big Rose Web Design,  
273 LLC. This work was supported by the National Institutes of Health [R35GM128871] and  
274 the University of Connecticut.

275

#### 276 **Footnotes**

277 None.

278

279

280

281 **Supplemental data**

282

283 *Diet component nutritional content reference files FileS1-S21:*

284 <https://doi.org/10.6084/m9.figshare.11920743.v1>

285

286 *Supplemental Table 1:*

287 Studies referenced in the Fly Microbiome Diet Database.

288

289 **Literature Cited**

290 Bjorndal, K. A., A. B. Bolten, and J. E. Moore, 1990 Digestive Fermentation in

291 Herbivores: Effect of Food Particle Size. *Physiological Zoology* 63: 710–721.

292 Broderick, N. A., 2016 Friend, foe or food? Recognition and the role of antimicrobial

293 peptides in gut immunity and *Drosophila*-microbe interactions. *Philos. Trans. R. Soc.*

294 Lond., B, Biol. Sci. 371: 20150295.

295 Brookheart, R. T., and J. G. Duncan, 2016 Modeling dietary influences on offspring

296 metabolic programming in *Drosophila melanogaster*. *Reproduction* 152: R79–90.

297 Buchon, N., N. A. Broderick, S. Chakrabarti, and B. Lemaitre, 2009 Invasive and

298 indigenous microbiota impact intestinal stem cell activity through multiple pathways

299 in *Drosophila*. *Genes & Development* 23: 2333–2344.

300 Chandler, J. A., J. M. Lang, S. Bhatnagar, J. A. Eisen, and A. Kopp, 2011 Bacterial

301 communities of diverse *Drosophila* species: ecological context of a host-microbe

302 model system. *PLoS Genet.* 7: e1002272.

- 303 Cheng, K. J., J. P. Fay, R. N. Coleman, L. P. Milligan, and J. W. Costerton, 1981  
304 Formation of bacterial microcolonies on feed particles in the rumen. *Appl. Environ.*  
305 *Microbiol.* 41: 298–305.
- 306 Davies, L. R., M. F. Schou, T. N. Kristensen, and V. Loeschcke, 2018 Linking  
307 developmental diet to adult foraging choice in *Drosophila melanogaster*. *J. Exp. Biol.*  
308 221: jeb175554.
- 309 Douglas, A. E., 2018 Contradictory Results in Microbiome Science Exemplified by  
310 Recent *Drosophila* Research. *MBio* 9: 854.
- 311 Edgecomb, R. S., C. E. Harth, and A. M. Schneiderman, 1994 Regulation of feeding  
312 behavior in adult *Drosophila melanogaster* varies with feeding regime and nutritional  
313 state. *J. Exp. Biol.* 197: 215–235.
- 314 Erkosar, B., E. Yashiro, F. Zajitschek, U. Friberg, A. A. Maklakov *et al.*, 2018 Host diet  
315 mediates a negative relationship between abundance and diversity of *Drosophila*  
316 gut microbiota. *Ecology and Evolution* 12: 959.
- 317 Grangeteau, C., F. Yahou, C. Everaerts, S. Dupont, J.-P. Farine *et al.*, 2018 Yeast  
318 quality in juvenile diet affects *Drosophila melanogaster* adult life traits. *Sci Rep* 8:  
319 13070–9.
- 320 Huang, J.-H., and A. E. Douglas, 2015 Consumption of dietary sugar by gut bacteria  
321 determines *Drosophila* lipid content. *Biol. Lett.* 11: 20150469.
- 322 Jang, T., and K. P. Lee, 2018 Comparing the impacts of macronutrients on life-history

- 323 traits in larval and adult *Drosophila melanogaster*: the use of nutritional geometry  
324 and chemically defined diets. J. Exp. Biol. 221: jeb181115.
- 325 Keebaugh, E. S., R. Yamada, and W. W. Ja, 2019 The Nutritional Environment  
326 Influences the Impact of Microbes on *Drosophila melanogaster* Life Span. (D. A.  
327 Garsin, Ed.). MBio 10: 670.
- 328 Keebaugh, E. S., R. Yamada, B. Obadia, W. B. Ludington, and W. W. Ja, 2018  
329 Microbial Quantity Impacts *Drosophila* Nutrition, Development, and Lifespan.  
330 iScience 4: 247–259.
- 331 Kiarie, E. G., and A. Mills, 2019 Role of Feed Processing on Gut Health and Function in  
332 Pigs and Poultry: Conundrum of Optimal Particle Size and Hydrothermal Regimens.  
333 Front Vet Sci 6: 19.
- 334 Kim, S. J., D. Han, B. H. Ahn, and J. S. Rhee, 1997 Effect of glutathione, catechin, and  
335 epicatechin on the survival of *Drosophila melanogaster* under paraquat treatment.  
336 Biosci. Biotechnol. Biochem. 61: 225–229.
- 337 Lee, K. P., S. J. Simpson, F. J. Clissold, R. Brooks, J. W. O. Ballard *et al.*, 2008  
338 Lifespan and reproduction in *Drosophila*: New insights from nutritional geometry.  
339 Proc. Natl. Acad. Sci. U.S.A. 105: 2498–2503.
- 340 Leftwich, P. T., N. V. E. Clarke, M. I. Hutchings, and T. Chapman, 2018 Reply to Obadia  
341 *et al.*: Effect of methyl paraben on host-microbiota interactions in *Drosophila*  
342 *melanogaster*. Proc. Natl. Acad. Sci. U.S.A. 115: E4549–E4550.



- 343 Martz, F. A., and R. L. Belyea, 1986 Role of particle size and forage quality in digestion  
344 and passage by cattle and sheep. *J. Dairy Sci.* 69: 1996–2008.
- 345 McAllister, T. A., H. D. Bae, G. A. Jones, and K. J. Cheng, 1994 Microbial attachment  
346 and feed digestion in the rumen. *J. Anim. Sci.* 72: 3004–3018.
- 347 Obadia, B., E. S. Keebaugh, R. Yamada, W. B. Ludington, and W. W. Ja, 2018 Diet  
348 influences host-microbiota associations in *Drosophila*. *Proc. Natl. Acad. Sci. U.S.A.*  
349 115: E4547–E4548.
- 350 Ormerod, K. G., O. K. LePine, P. S. Abbineni, J. M. Bridgeman, J. R. Coorsen *et al.*,  
351 2017 *Drosophila* development, physiology, behavior, and lifespan are influenced by  
352 altered dietary composition. *Fly (Austin)* 11: 153–170.
- 353 Piper, M. D. W., E. Blanc, R. Leitão-Gonçalves, M. Yang, X. He *et al.*, 2014 A holidic  
354 medium for *Drosophila melanogaster*. *Nat. Methods* 11: 100–105.
- 355 Piper, M. D. W., D. Skorupa, and L. Partridge, 2005 Diet, metabolism and lifespan in  
356 *Drosophila*. *Exp. Gerontol.* 40: 857–862.
- 357 Sharon, G., D. Segal, J. M. Ringo, A. Hefetz, I. Zilber-Rosenberg *et al.*, 2010  
358 Commensal bacteria play a role in mating preference of *Drosophila melanogaster*.  
359 *Proc. Natl. Acad. Sci. U.S.A.* 107: 20051–20056.
- 360 Shin, S. C., S.-H. Kim, H. You, B. Kim, A. C. Kim *et al.*, 2011 *Drosophila* microbiome  
361 modulates host developmental and metabolic homeostasis via insulin signaling.  
362 *Science* 334: 670–674.

- 363 Stefana, M. I., P. C. Driscoll, F. Obata, A. R. Pengelly, C. L. Newell *et al.*, 2017  
364 Developmental diet regulates *Drosophila* lifespan via lipid autotoxins. *Nat Commun*  
365 8: 1384–13.
- 366 Storelli, G., A. Defaye, B. Erkosar, P. Hols, J. Royet *et al.*, 2011 *Lactobacillus plantarum*  
367 promotes *Drosophila* systemic growth by modulating hormonal signals through  
368 TOR-dependent nutrient sensing. *Cell Metab.* 14: 403–414.
- 369 Vermeulen, K., J. Verspreet, C. M. Courtin, F. Haesebrouck, S. Baeyen *et al.*, 2018  
370 Reduced-Particle-Size Wheat Bran Is Efficiently Colonized by a Lactic Acid-  
371 Producing Community and Reduces Levels of *Enterobacteriaceae* in the Cecal  
372 Microbiota of Broilers. (C. M. Dozois, Ed.). *Appl. Environ. Microbiol.* 84: 1260.
- 373 Wong, A. C.-N., A. J. Dobson, and A. E. Douglas, 2014 Gut microbiota dictates the  
374 metabolic response of *Drosophila* to diet. *J. Exp. Biol.* 217: 1894–1901.
- 375 Yamada, R., S. A. Deshpande, K. D. Bruce, E. M. Mak, and W. W. Ja, 2015 Microbes  
376 Promote Amino Acid Harvest to Rescue Undernutrition in *Drosophila*. *Cell Rep* 10:  
377 865–872.
- 378

**Table S1.** Studies referenced in the Fly Microbiome Diet Database.

| DATABASE ROW | CITATION                      | DOI                              |
|--------------|-------------------------------|----------------------------------|
| 8            | Brummel <i>et al.</i> 2004    | 10.1073/pnas.0405207101          |
| 9            | Ren <i>et al.</i> 2007        | 10.1016/j.cmet.2007.06.006       |
| 10, 11       | Sharon <i>et al.</i> 2010     | 10.1073/pnas.1009906107          |
| 12, 13       | Shin <i>et al.</i> 2011       | 10.1126/science.1212782          |
| 14           | Wong <i>et al.</i> 2011       | 10.1111/j.1462-2920.2011.02511.x |
| 15, 16       | Storelli <i>et al.</i> 2011   | 10.1016/j.cmet.2011.07.012       |
| 17           | Chandler <i>et al.</i> 2011   | 10.1371/journal.pgen.1002272     |
| 18           | Ridley <i>et al.</i> 2012     | 10.1371/journal.pone.0036765     |
| 19           | Blum <i>et al.</i> 2013       | 10.1128/mBio.00860-13            |
| 20           | Fink <i>et al.</i> 2013       | 10.1128/AEM.01903-13             |
| 21           | Staubach <i>et al.</i> 2013   | 10.1371/journal.pone.0070749     |
| 22           | Erkosar <i>et al.</i> 2014    | 10.1371/journal.pone.0094729     |
| 23           | Newell and Douglas 2014       | 10.1128/AEM.02742-13             |
| 24           | Broderick <i>et al.</i> 2014  | 10.1128/mBio.01117-14            |
| 25           | Piper <i>et al.</i> 2014      | 10.1038/nmeth.2731               |
| 26           | Clark <i>et al.</i> 2015      | 10.1016/j.celrep.2015.08.004     |
| 27           | Deshpande <i>et al.</i> 2015  | 10.3945/jn.115.222380            |
| 28, 29, 30   | Yamada <i>et al.</i> 2015     | 10.1016/j.celrep.2015.01.018     |
| 31           | Sansone <i>et al.</i> 2015    | 10.1016/j.chom.2015.10.010       |
| 32           | Huang and Douglas 2015        | 10.1098/rsbl.2015.0469           |
| 33           | Chaplinska <i>et al.</i> 2016 | 10.1371/journal.pone.0167726     |
| 34           | Li <i>et al.</i> 2016         | 10.1016/j.chom.2016.01.008       |
| 35           | Galenza <i>et al.</i> 2016    | 10.1242/bio.015016               |
| 36           | Sekihara <i>et al.</i> 2016   | 10.1074/jbc.M116.761791          |
| 37           | Shanbhag <i>et al.</i> 2016   | 10.1113/JP272617                 |

|                   |                                     |                                |
|-------------------|-------------------------------------|--------------------------------|
| <b>38</b>         | Elgart <i>et al.</i> 2016           | 10.1038/ncomms11280            |
| <b>39</b>         | Sebald <i>et al.</i> 2016           | 10.1371/journal.pone.0153476   |
| <b>40</b>         | Dobson <i>et al.</i> 2016           | 10.1186/s12864-016-3307-9      |
| <b>41</b>         | Fischer <i>et al.</i> 2017          | 10.7554/eLife.18855            |
| <b>42</b>         | Han <i>et al.</i> 2017              | 10.1007/s00248-016-0925-3      |
| <b>43</b>         | Leitão-Gonçalves <i>et al.</i> 2017 | 10.1371/journal.pbio.2000862   |
| <b>44</b>         | Wong <i>et al.</i> 2017             | 10.1016/j.cub.2017.07.022      |
| <b>45</b>         | Winans <i>et al.</i> 2017           | 10.1111/mec.14232              |
| <b>46</b>         | Obadia <i>et al.</i> 2017           | 10.1016/j.cub.2017.05.034      |
| <b>47, 48, 49</b> | Jehrke <i>et al.</i> 2018           | 10.1038/s41598-018-24542-5     |
| <b>50, 51, 52</b> | Erkosar <i>et al.</i> 2018          | 10.1002/ece3.4444              |
| <b>53</b>         | Martino <i>et al.</i> 2018          | 10.1016/j.chom.2018.06.001     |
| <b>54</b>         | Pais <i>et al.</i> 2018             | 10.1371/journal.pbio.2005710   |
| <b>55</b>         | Fast, Duggal, <i>et al.</i> 2018    | 10.1128/mBio.01114-18          |
| <b>56</b>         | Fast, Kostiuk, <i>et al.</i> 2018   | 10.1073/pnas.1802165115        |
| <b>57</b>         | Storelli <i>et al.</i> 2018         | 10.1016/j.cmet.2017.11.011     |
| <b>58, 59</b>     | Téfit <i>et al.</i> 2018            | 10.1016/j.jinsphys.2017.09.003 |
| <b>60</b>         | Inamine <i>et al.</i> 2018          | 10.1128/mBio.01453-17          |
| <b>61, 62</b>     | Keebaugh <i>et al.</i> 2018         | 10.1016/j.isci.2018.06.004     |
| <b>63</b>         | Obata <i>et al.</i> 2018            | 10.1038/s41467-018-03070-w     |
| <b>64</b>         | Gould <i>et al.</i> 2018            | 10.1073/pnas.1809349115        |
| <b>65, 66</b>     | Keebaugh <i>et al.</i> 2019         | 10.1128/mBio.00885-19          |
| <b>67</b>         | Su <i>et al.</i> 2019               | 10.1186/s12866-019-1686-1      |
| <b>68</b>         | Solomon <i>et al.</i> 2019          | 10.7717/peerj.8097             |
| <b>69</b>         | Si <i>et al.</i> 2019               | 10.1093/gerona/gly189          |
| <b>70</b>         | Dong <i>et al.</i> 2019             | 10.3390/nu11030636             |
| <b>71</b>         | Tang <i>et al.</i> 2019             | 10.1016/j.jinsphys.2019.103893 |

|               |                              |                              |
|---------------|------------------------------|------------------------------|
| <b>72</b>     | Henry <i>et al.</i> 2020     | 10.1016/j.cbpa.2019.110626   |
| <b>73</b>     | Slankster <i>et al.</i> 2019 | 10.1893/0005-3155-90.4.227   |
| <b>74, 75</b> | Adair <i>et al.</i> 2020     | 10.1038/s41396-019-0532-7    |
| <b>76</b>     | Fast <i>et al.</i> 2020      | 10.1016/j.celrep.2019.12.094 |
| <b>77, 78</b> | Lee <i>et al.</i> 2020       | 10.1007/s00248-019-01404-9   |
